# Supplementary material
Source: HighWire-hosted journal article supplement (https://diabetes.diabetesjournals.org/content/suppl/2003/11/07/52.11.2748)
Supplement: Appendix1.0403.pdf [file Appendix1.0403.pdf]

Appendix 1. The rationale for choosing HbA1c of 8% as a cut-off value for the poorly controlled group was based upon the authors' previous experience (Hawkins et al, Reference 4) indicating a marked difference in glucose effectiveness between subjects with average HbA<sub>1C</sub> values of 5.8% (Range: 4.5-7.5%) and 9.9% (Range: 7.8-14.0%). Those individuals who were in good control (mean HbA<sub>1C</sub> 5.8%) demonstrated a normal ability of hyperglycemia to suppress endogenous glucose production and stimulate glucose uptake. By contrast, glucose effectiveness was markedly blunted in those individuals in poor glycaemic control (mean HbA<sub>1C</sub> 9.9%).
