# Supplementary material
Source: HighWire-hosted journal article supplement (https://diabetes.diabetesjournals.org/content/suppl/2003/11/07/52.11.2748)
Supplement: Appendix2.0403.pdf [file Appendix2.0403.pdf]

Appendix 2. In the good control (GC) group (n=10), nine subjects were treated with oral agents (three with metformin alone, three with sulfonylureas alone, one with a sulfonylurea and a thiazolidinedione, one with a sulfonylurea and metformin, and one with metformin and a thiazolidinedione), while one was controlled with diet alone. In the poor control (PC) group (n=9), five subjects were treated with oral hypoglycemic agents alone (one with sulfonylurea alone, two with metformin and sulfonylureas, one with sulfonylurea and thiazolidinediones, and two with metformin alone), one with a combination of insulin and oral agents, two with insulin alone, and one with diet alone.

Sulfonylureas and metformin were discontinued at least 48 hours before the study, thiazolidinediones were held 8 days and long-acting insulin was withheld the evening before the study, following an established rationale (4).
